# Supplementary material for: PdAg/Ag(111) Surface Alloys: A Highly Efficient Catalyst of Oxygen Reduction Reaction
Source: MDPI journal article supplement (doi:10.3390/nano12111802), 2022-05-25
Supplement: s1 [file s1]

## Supplementary Materials

# PdAg/Ag(111) Surface Alloys: A Highly Efficient Catalyst of Oxygen Reduction Reaction

Minghao Hua, Xuelei Tian \*, Shuo Li and Xiaohang Lin \*

Key Laboratory for Liquid-Solid Structural Evolution and Processing of Materials, Ministry of Education, School of Materials Science and Engineering, Shandong University, Jinan 250061, China;

huaminghao@outlook.com (M.H.); 18366111497@163.com (S.L.)

\* Correspondence: lxh12345@sdu.edu.cn (X.L.); tianxuelei@sdu.edu.cn (X.T.)

**Table S1** The free energies of the adsorption of ORR intermediates in eV on

all active site models.

| Active site model                          | $\Delta G_{*OOH}$ | $\Delta G_{*O}$ | $\Delta G_{OH*}$ |
|--------------------------------------------|-------------------|-----------------|------------------|
| Pd <sub>M</sub> @Ag(111)                   | 4.15194           | 1.76072         | 0.78351          |
| Pd <sub>D</sub> @Ag(111)                   | 4.08826           | 1.64927         | 0.80979          |
| Pd <sub>T1</sub> @Ag(111)                  | 4.14847           | 1.62848         | 0.87055          |
| Pd <sub>T2</sub> @Ag(111)                  | 4.16367           | 1.69931         | 0.85212          |
| Pd <sub>T3</sub> @Ag(111)                  | 4.16664           | 1.67661         | 0.84570          |
| Pd <sub>M</sub> @Pd <sub>1L</sub> Ag(111)  | 4.10261           | 1.84045         | 0.81721          |
| Pd <sub>D</sub> @Pd <sub>1L</sub> Ag(111)  | 4.02477           | 1.63452         | 0.75966          |
| Pd <sub>T1</sub> @Pd <sub>1L</sub> Ag(111) | 3.98324           | 1.40795         | 0.78896          |
| Pd <sub>T2</sub> @Pd <sub>1L</sub> Ag(111) | 4.05015           | 1.54504         | 0.79159          |
| Pd <sub>T3</sub> @Pd <sub>1L</sub> Ag(111) | 4.04202           | 1.62215         | 0.75420          |
| Pd <sub>1L</sub> Ag(111)                   | 4.23506           | 2.10597         | 0.82387          |

**Table S2** *d*-band center and Bader charge of Pd atom at the first layer of all

| models                                     |                       |              |
|--------------------------------------------|-----------------------|--------------|
| Active site model                          | <i>d</i> -band center | Bader charge |
| Pd <sub>M</sub> @Ag(111)                   | -1.545                | -0.229       |
| Pd <sub>D</sub> @Ag(111)                   | -1.496                | -0.207       |
| Pd <sub>T1</sub> @Ag(111)                  | -1.617                | -0.188       |
| Pd <sub>T2</sub> @Ag(111)                  | -1.609                | -0.198       |
| Pd <sub>T3</sub> @Ag(111)                  | -1.593                | -0.198       |
| Pd <sub>M</sub> @Pd <sub>1L</sub> Ag(111)  | -1.329                | -0.154       |
| Pd <sub>D</sub> @Pd <sub>1L</sub> Ag(111)  | -1.292                | -0.129       |
| Pd <sub>T1</sub> @Pd <sub>1L</sub> Ag(111) | -1.426                | -0.116       |
| Pd <sub>T2</sub> @Pd <sub>1L</sub> Ag(111) | -1.410                | -0.121       |
| Pd <sub>T3</sub> @Pd <sub>1L</sub> Ag(111) | -1.394                | -0.122       |

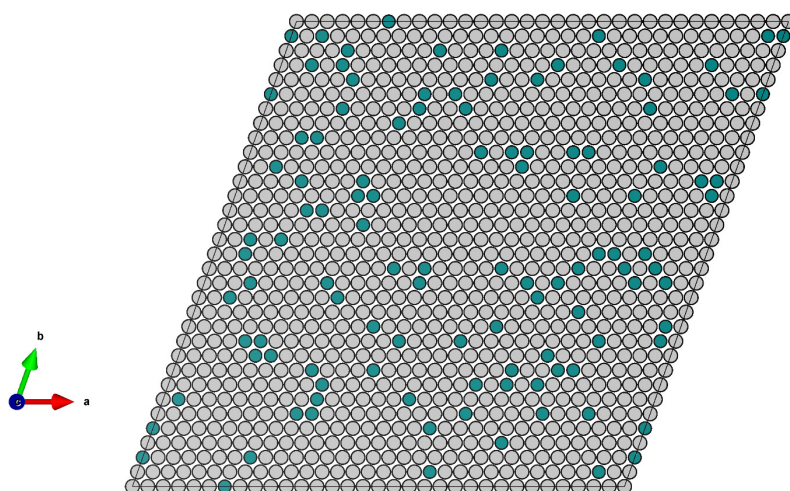

**Figure S1** MC snapshots of the atomic structure of PdAg(111) with 50% Pd at 1200 K.<sup>[1]</sup> The silver and green balls represent Ag and Pd atoms, respectively.

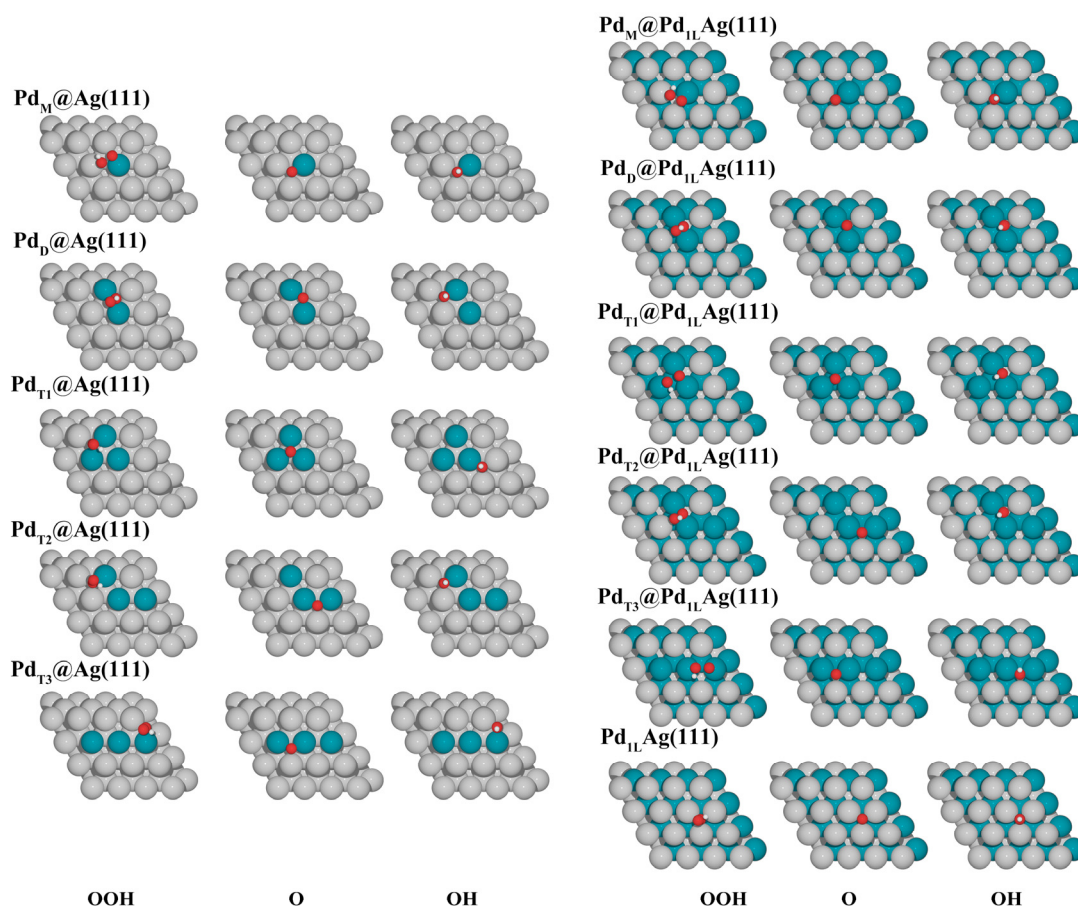

**Figure S2** Top view of the atomistic structures of all ORR intermediates on all considered surfaces. The silver, cyan, red, and white balls represent Ag, Pd, O, and H atoms, respectively.

## References

- [1] Hua, M.; Tian, X.; Li, S.; Zhang, X.; Shao, A.; Song, L.; Lin, X. A casting combined quenching strategy to prepare PdAg single atom alloy designed by Cluster Expansion combined Monte Carlo method. *Phys. Chem. Chem. Phys.* 2021, doi:10.1039/d1cp05046j.
